# Supplementary material for: Structure, conformational properties and matrix photochemistry ofS-(tert-butyl)trifluorothioacetate CF3C(O)SC(CH3)3
Source: Royal Society of Chemistry journal article supplement (doi:10.1039/d0nj03173a), 2020-01-01
Supplement: d0nj03173a1.pdf [file d0nj03173a1.pdf]

## Structure, Conformational Properties and Matrix Photochemistry of $\text{CF}_3\text{C}(\text{O})\text{SC}(\text{CH}_3)_3$

Vanina M. Cayón<sup>a</sup>, Mauricio F. Erben<sup>a\*</sup>, Rosana M. Romano<sup>a</sup>, Hans-Georg Stammler<sup>b</sup>, Norbert W. Mitzel<sup>b\*</sup> and Carlos O. Della Védova<sup>a\*</sup>

<sup>a</sup>CEQUINOR (UNLP-CONICET, CCT-La Plata, associated with CIC), Departamento de Química, Facultad de Ciencias Exactas, Universidad Nacional de La Plata, CC 962, Bv. 120 e/ 60 y 64 N°1465 La Plata B1900, Buenos Aires, Argentina.

<sup>b</sup>Universität Bielefeld, Lehrstuhl für Anorganische Chemie und Strukturchemie, Universitätsstraße 25, 33615 Bielefeld, Germany.

\*Corresponding authors: [carlosdv@quimica.unlp.edu.ar](mailto:carlosdv@quimica.unlp.edu.ar) (CODV); [erben@quimica.unlp.edu.ar](mailto:erben@quimica.unlp.edu.ar) (MFE) and [mitzel@uni-bielefeld.de](mailto:mitzel@uni-bielefeld.de) (NWM)

### New Journal of Chemistry

#### Supporting information

**Figure S1.** Clausius-Clapeyron plot for liquid  $\text{CF}_3\text{C}(\text{O})\text{SC}(\text{CH}_3)_3$

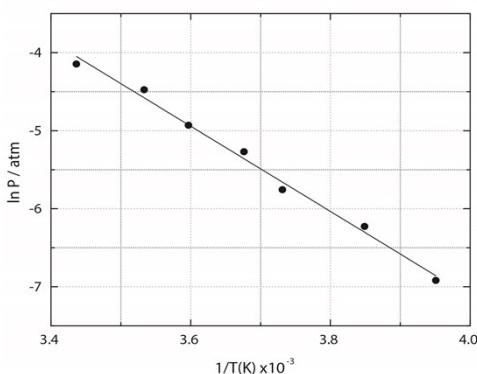

**Figure S2.** Vapour pressure curve of  $\text{CF}_3\text{C}(\text{O})\text{SC}(\text{CH}_3)_3$ .

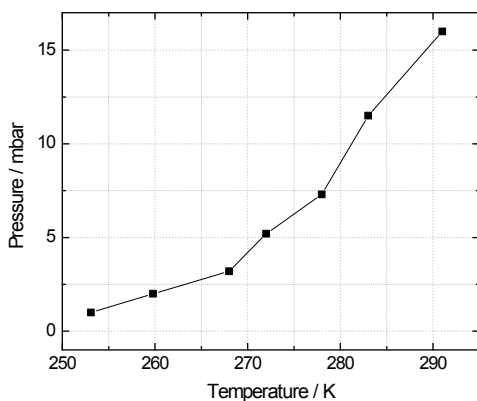

**Figure S3.** NMR  $^1\text{H}$ ,  $^{19}\text{F}$  and  $^{13}\text{C}$  spectra of  $\text{CF}_3\text{C}(\text{O})\text{SC}(\text{CH}_3)_3$ . All samples were measured in  $\text{CDCl}_3$ .

a)  $^{13}\text{C}\{^1\text{H}\}$  NMR spectrum.

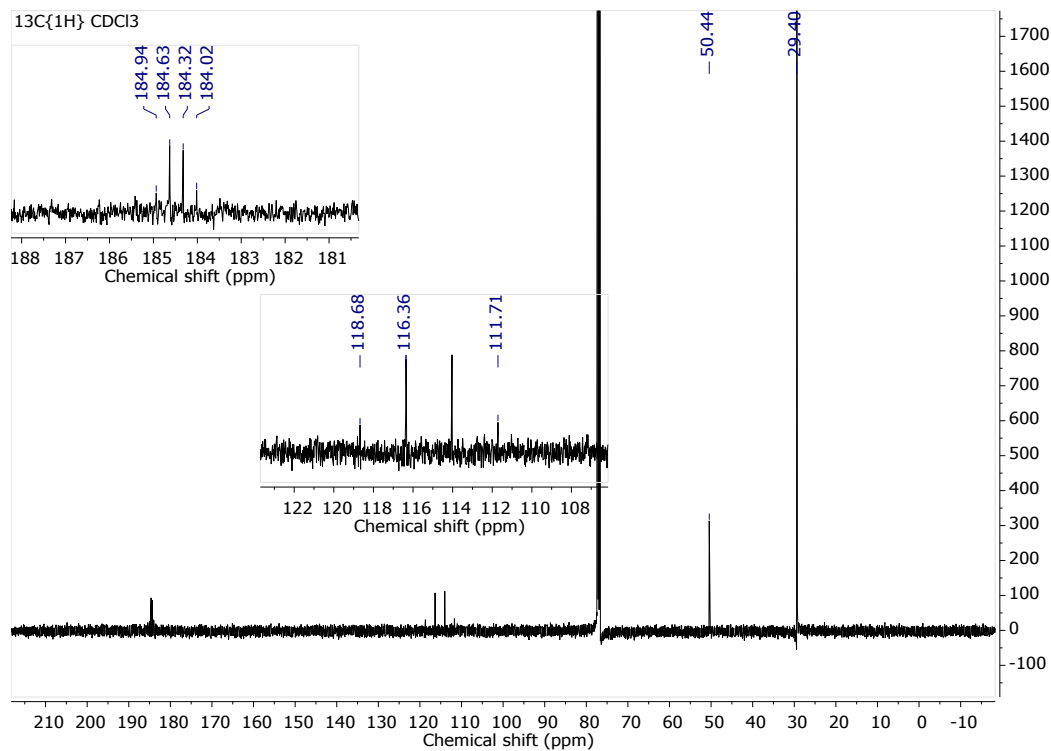

b)  $^{19}\text{F}$  NMR spectrum.

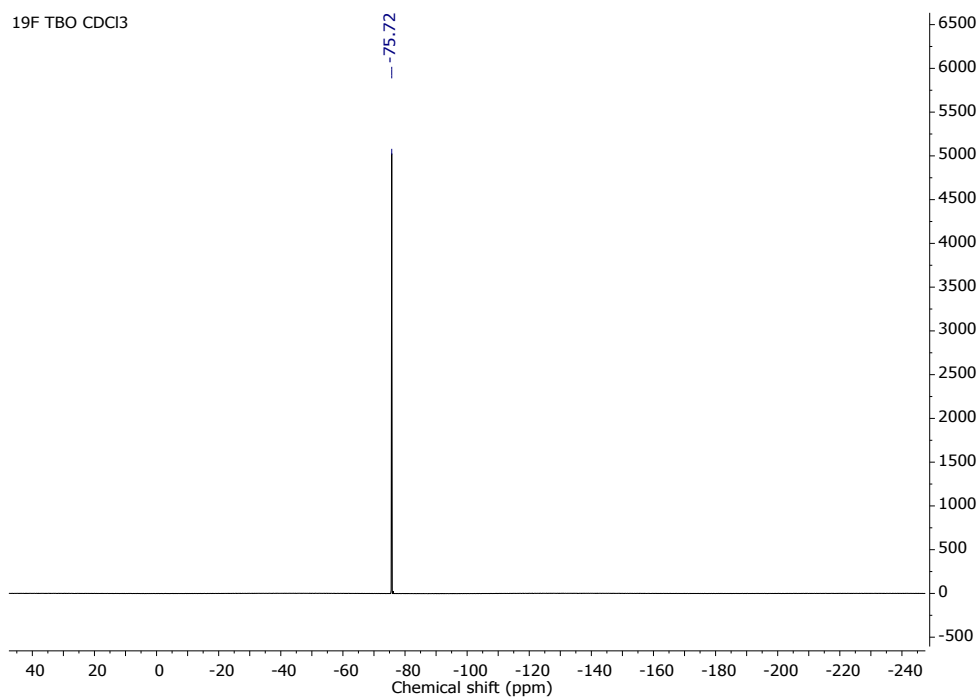

c)  $^{13}\text{C}\{^{19}\text{F}\}$  NMR spectrum.

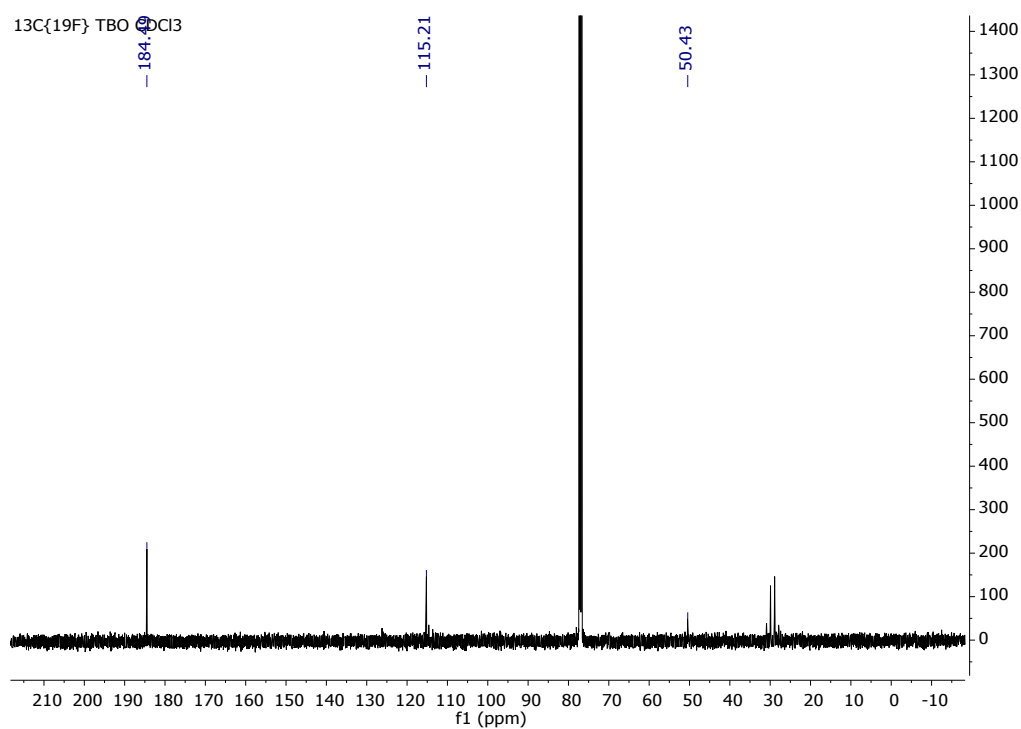

$^{13}\text{C}\{^{19}\text{F}\}$  TBO  $\text{CDCl}_3$

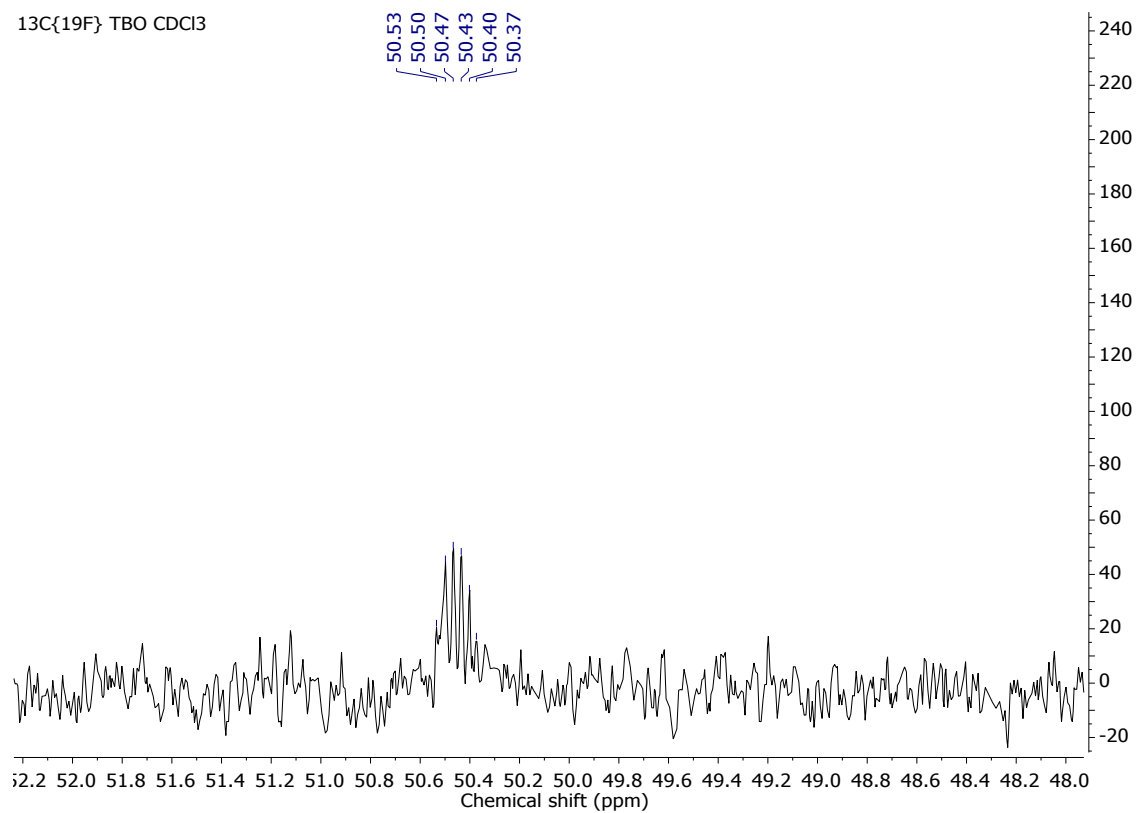

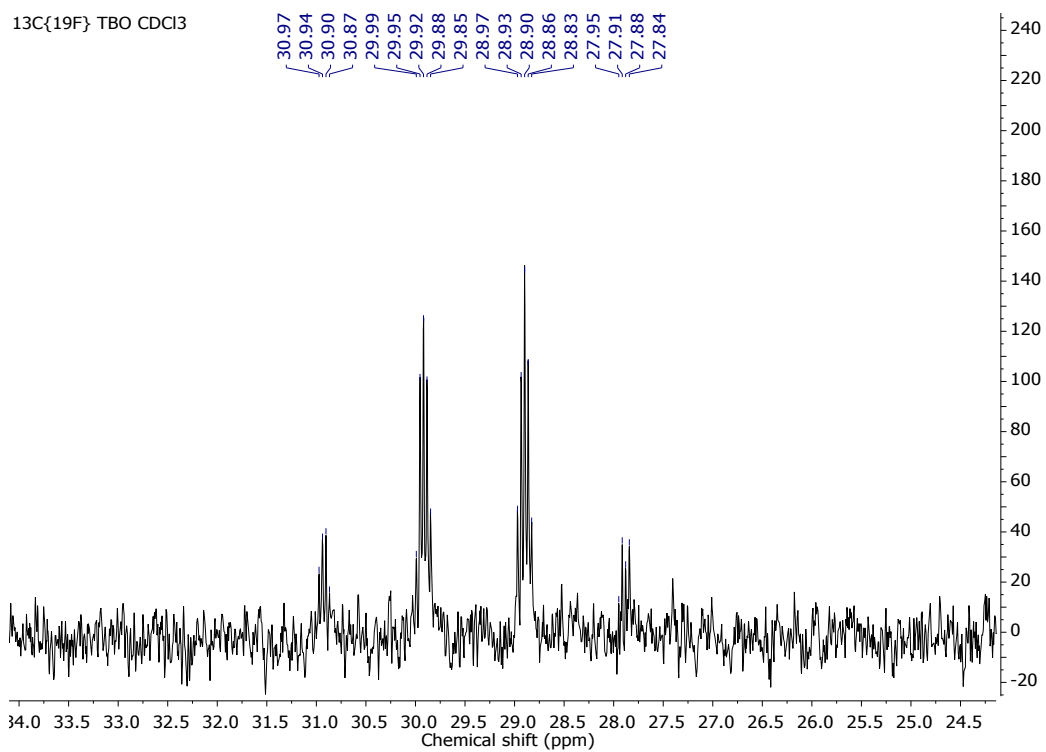

d)  $^1\text{H}$  NMR spectrum. (Signal at 7.28 ppm corresponds to a solvent impurity).

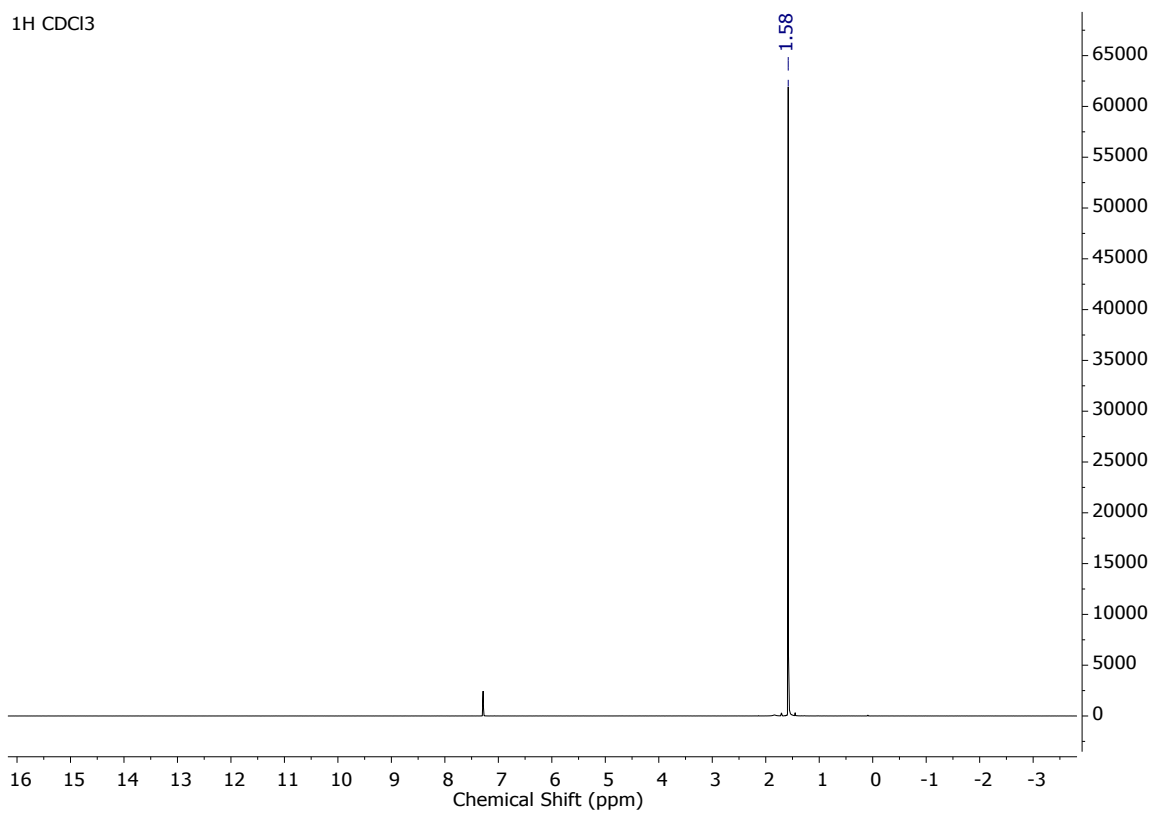

**Figure S4.** GC-MS chromatogram of  $\text{CF}_3\text{C}(\text{O})\text{SC}(\text{CH}_3)_3$ .

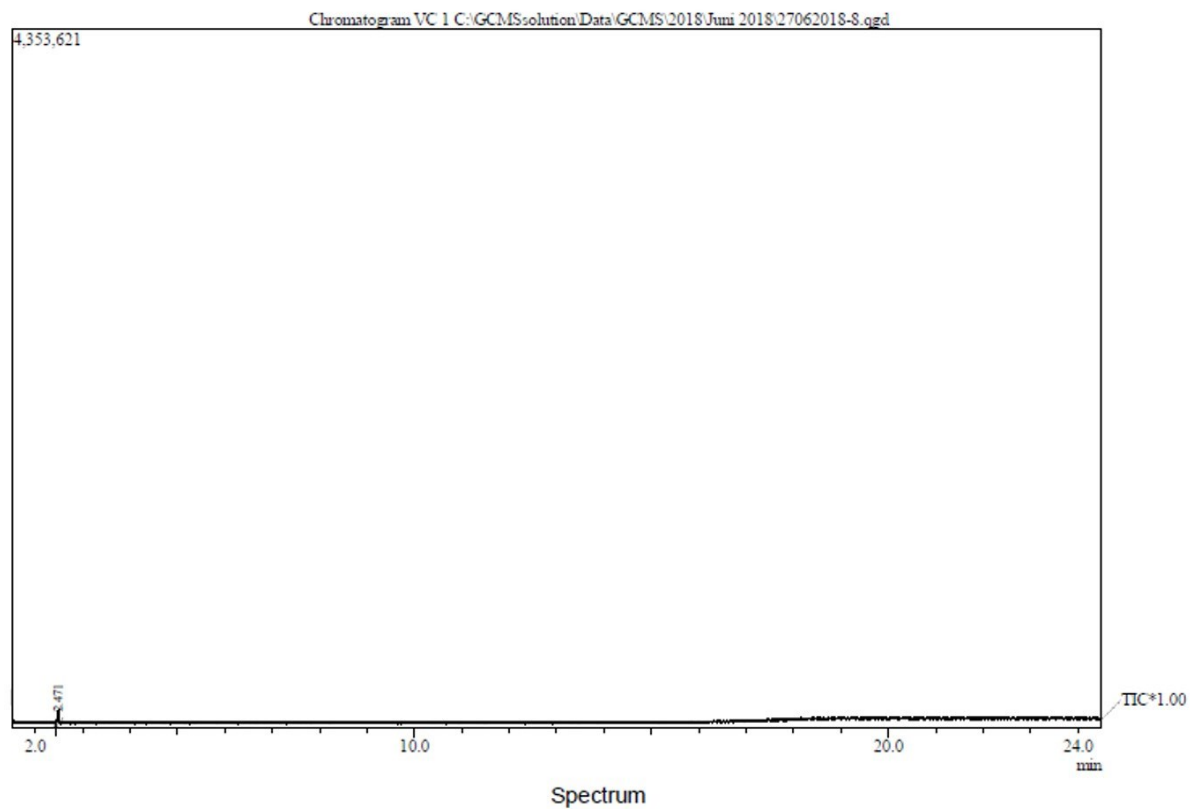

Line#:1 R.Time:2.5(Scan#:583)  
MassPeaks:180  
RawMode:Single 2.5(583) BasePeak:131(36234)  
BG Mode:None Group 1 - Event 1

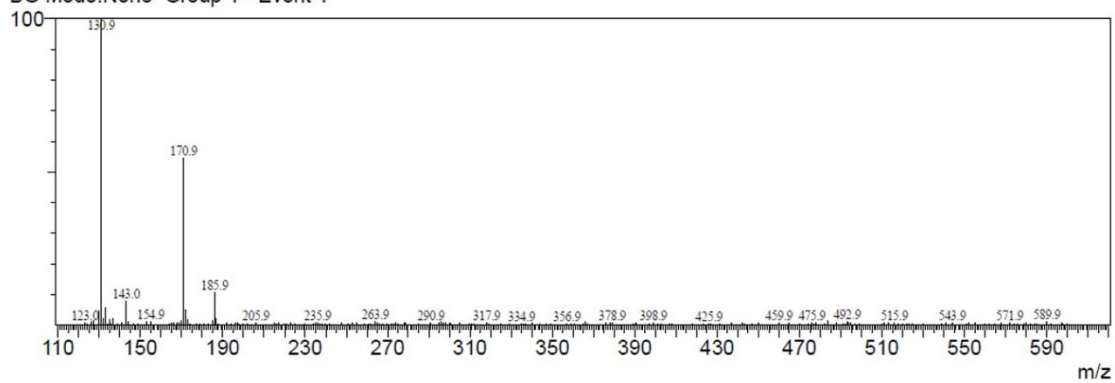

**Table S1.** Crystallographic data for CF<sub>3</sub>C(O)SC(CH<sub>3</sub>)<sub>3</sub>

CCDC 2004500 contains the supplementary crystallographic data for this paper. These data can be obtained free of charge from The Cambridge Crystallographic Data Centre via [www.ccdc.cam.ac.uk/conts/retrieving.html](http://www.ccdc.cam.ac.uk/conts/retrieving.html)

**S1.1** Crystal data and structure refinement for CF<sub>3</sub>C(O)SC(CH<sub>3</sub>)<sub>3</sub>

|                                                              |                                                                               |
|--------------------------------------------------------------|-------------------------------------------------------------------------------|
| Empirical formula                                            | C <sub>6</sub> H <sub>9</sub> F <sub>3</sub> OS                               |
| Formula weight / g/mol                                       | 186.19                                                                        |
| Temperature / K                                              | 94.0(2)                                                                       |
| Crystal system                                               | monoclinic                                                                    |
| Space group                                                  | <i>P</i> 2 <sub>1</sub> / <i>c</i>                                            |
| <i>a</i> /Å                                                  | 12.34413(7)                                                                   |
| <i>b</i> /Å                                                  | 11.69960(6)                                                                   |
| <i>c</i> /Å                                                  | 11.73975(9)                                                                   |
| <i>α</i> /°                                                  | 90                                                                            |
| <i>β</i> /°                                                  | 95.4183(6)                                                                    |
| <i>γ</i> /°                                                  | 90                                                                            |
| Volume / Å <sup>3</sup>                                      | 1687.895(18)                                                                  |
| <i>Z</i>                                                     | 8                                                                             |
| $\rho_{\text{calc}}$ / g cm <sup>-3</sup>                    | 1.465                                                                         |
| $\mu$ / mm <sup>-1</sup>                                     | 0.376                                                                         |
| <i>F</i> (000)                                               | 768                                                                           |
| Crystal size/mm <sup>3</sup>                                 | 0.619 × 0.305 × 0.269                                                         |
| Radiation                                                    | MoK $\alpha$ ( $\lambda$ = 0.71073)                                           |
| 2 $\theta$ range for data collection/°                       | 3.314 to 102.782                                                              |
| Index ranges                                                 | -27 ≤ <i>h</i> ≤ 27, -25 ≤ <i>k</i> ≤ 25, -24 ≤ <i>l</i> ≤ 25                 |
| Reflections collected                                        | 350214                                                                        |
| Independent reflections                                      | 18678 [ <i>R</i> <sub>int</sub> = 0.0420, <i>R</i> <sub>sigma</sub> = 0.0143] |
| Data/restraints/parameters                                   | 18678/0/810                                                                   |
| Goodness-of-fit on <i>F</i> <sup>2</sup>                     | 1.506                                                                         |
| Final <i>R</i> indexes [ <i>I</i> ≥ 2 $\sigma$ ( <i>I</i> )] | <i>R</i> <sub>1</sub> = 0.019                                                 |
| Final <i>R</i> indexes [all data]                            | <i>R</i> <sub>1</sub> = 0.037, w <i>R</i> <sub>2</sub> = 0.022                |
| Largest diff. peak/hole / e Å <sup>-3</sup>                  | 0.23/-0.29                                                                    |
| CCDC                                                         | 2004500                                                                       |

**S1.2** Fractional atomic coordinates ( $\times 10^4$ ) and equivalent isotropic displacement parameters ( $\text{\AA}^2 \times 10^3$ ) for  $\text{CF}_3\text{C}(\text{O})\text{SC}(\text{CH}_3)_3$ .  $U_{\text{eq}}$  is defined as 1/3 of the trace of the orthogonalized UIJ tensor

| Atom  | <i>x</i>    | <i>y</i>    | <i>z</i>   | $U_{\text{eq}}$ |
|-------|-------------|-------------|------------|-----------------|
| S(1)  | 4449.52(4)  | 3493.43(4)  | 814.59(5)  | 16              |
| S(2)  | 577.52(4)   | 4227.08(4)  | 3424.22(5) | 17              |
| F(1)  | 2984.6(5)   | 4702.2(6)   | -717.4(6)  | 25              |
| F(2)  | 1659.3(4)   | 4745.9(5)   | 351.6(7)   | 25              |
| F(3)  | 2884.0(6)   | 6063.6(4)   | 513.4(7)   | 27              |
| F(4)  | 2102.8(7)   | 5752.2(5)   | 4509.5(8)  | 30              |
| F(5)  | 2163.4(6)   | 4704.4(7)   | 6038.0(7)  | 28              |
| F(6)  | 3417.7(4)   | 4567.1(6)   | 4889.2(6)  | 25              |
| O(1)  | 3103.4(4)   | 4339.8(4)   | 2249.4(4)  | 24              |
| O(2)  | 2007.7(3)   | 2774.0(3)   | 4469.0(4)  | 23              |
| C(1)  | 3378.19(17) | 4256.35(18) | 1290.0(2)  | 16              |
| C(2)  | 2718.73(18) | 4943.00(18) | 331.2(3)   | 18              |
| C(3)  | 5092.63(18) | 2768.42(18) | 2103.9(2)  | 15              |
| C(4)  | 5986.2(2)   | 2068.9(3)   | 1611.4(3)  | 25              |
| C(5)  | 4286.8(2)   | 1977.2(2)   | 2614.5(3)  | 22              |
| C(6)  | 5582.5(2)   | 3635.5(2)   | 2972.3(3)  | 24              |
| C(7)  | 1702.35(17) | 3741.84(18) | 4288.0(2)  | 16              |
| C(8)  | 2355.15(18) | 4716.2(2)   | 4928.7(3)  | 19              |
| C(9)  | -37.29(18)  | 2920.62(19) | 2757.6(2)  | 17              |
| C(10) | -973.5(3)   | 3399.0(3)   | 1950.0(4)  | 30              |
| C(11) | -467.9(3)   | 2147.0(3)   | 3654.3(3)  | 27              |
| C(12) | 773.0(2)    | 2305.7(2)   | 2071.0(3)  | 22              |

**S1.3** Anisotropic displacement parameters ( $\text{\AA}^2 \times 10^3$ ) for  $\text{CF}_3\text{C}(\text{O})\text{SC}(\text{CH}_3)_3$ . The anisotropic displacement factor exponent takes the form:  $-2\pi^2[h^2a^*U_{11}+2hka^*b^*U_{12}+\dots]$

| Atom  | $U_{11}$  | $U_{22}$   | $U_{33}$  | $U_{23}$   | $U_{13}$   | $U_{12}$   |
|-------|-----------|------------|-----------|------------|------------|------------|
| S(1)  | 17.09(2)  | 19.18(2)   | 12.28(2)  | 2.055(17)  | 3.406(16)  | 4.311(15)  |
| S(2)  | 17.67(2)  | 13.232(18) | 19.44(3)  | -1.201(17) | -1.993(18) | 2.374(14)  |
| F(1)  | 28.5(2)   | 29.7(2)    | 17.0(2)   | 4.18(17)   | 2.72(17)   | 9.77(17)   |
| F(2)  | 16.49(16) | 26.83(19)  | 30.7(2)   | 3.67(19)   | 0.39(16)   | 2.30(13)   |
| F(3)  | 31.8(2)   | 16.01(16)  | 32.2(3)   | 2.54(17)   | 0.6(2)     | 0.57(15)   |
| F(4)  | 32.3(2)   | 16.57(16)  | 38.8(3)   | 1.28(19)   | -5.3(2)    | -5.99(16)  |
| F(5)  | 29.6(2)   | 34.2(2)    | 20.8(2)   | -7.6(2)    | 6.7(2)     | -10.37(19) |
| F(6)  | 16.62(16) | 33.7(2)    | 25.5(2)   | -2.2(2)    | 1.52(15)   | -5.76(15)  |
| O(1)  | 26.07(14) | 31.01(16)  | 16.85(16) | 0.78(13)   | 7.56(13)   | 8.60(14)   |
| O(2)  | 23.38(13) | 15.25(11)  | 29.74(19) | 2.75(12)   | -5.26(14)  | 2.72(9)    |
| C(1)  | 16.09(7)  | 17.44(7)   | 14.66(10) | 0.26(7)    | 3.45(7)    | 2.19(6)    |
| C(2)  | 17.33(8)  | 16.60(8)   | 19.19(11) | 1.65(7)    | 2.17(7)    | 2.75(6)    |
| C(3)  | 17.04(7)  | 14.80(7)   | 13.54(10) | 0.94(7)    | 1.25(7)    | 0.29(6)    |
| C(4)  | 25.71(10) | 26.1(1)    | 22.63(14) | 4.66(10)   | 5.57(10)   | 11.11(9)   |
| C(5)  | 26.12(10) | 19.36(8)   | 19.88(12) | 3.94(9)    | 3.73(9)    | -4.32(8)   |
| C(6)  | 25.98(10) | 21.15(9)   | 22.30(13) | -2.54(9)   | -6.0(1)    | -2.70(8)   |
| C(7)  | 15.35(7)  | 14.17(7)   | 17.21(10) | 0.87(7)    | -0.04(7)   | 0.01(6)    |
| C(8)  | 17.64(8)  | 18.87(8)   | 19.13(12) | -0.82(8)   | 1.12(8)    | -3.87(6)   |
| C(9)  | 16.29(8)  | 18.07(8)   | 16.51(11) | -2.61(7)   | 2.01(7)    | -1.33(6)   |
| C(10) | 24.30(11) | 35.25(13)  | 28.36(16) | -6.99(13)  | -9.16(11)  | 4.02(11)   |
| C(11) | 29.52(12) | 29.41(12)  | 23.90(15) | -1.98(11)  | 9.19(11)   | -12.17(10) |
| C(12) | 23.02(10) | 21.96(9)   | 23.39(13) | -7.29(9)   | 7.58(10)   | -2.40(8)   |

**S1.4** Bond lengths for  $\text{CF}_3\text{C}(\text{O})\text{SC}(\text{CH}_3)_3$

|      | Atom | Length/ $\text{\AA}$ |      | Atom  | Length/ $\text{\AA}$ |
|------|------|----------------------|------|-------|----------------------|
| S(1) | C(1) | 1.7311(2)            | O(1) | C(1)  | 1.2105(5)            |
| S(1) | C(3) | 1.8477(2)            | O(2) | C(7)  | 1.2059(4)            |
| S(2) | C(7) | 1.7357(2)            | C(1) | C(2)  | 1.5499(3)            |
| S(2) | C(9) | 1.8473(2)            | C(3) | C(4)  | 1.5301(3)            |
| F(1) | C(2) | 1.3337(7)            | C(3) | C(5)  | 1.5226(3)            |
| F(2) | C(2) | 1.3304(5)            | C(3) | C(6)  | 1.5224(3)            |
| F(3) | C(2) | 1.3409(6)            | C(7) | C(8)  | 1.5492(3)            |
| F(4) | C(8) | 1.3340(6)            | C(9) | C(10) | 1.5299(4)            |
| F(5) | C(8) | 1.3454(8)            | C(9) | C(11) | 1.5217(4)            |
| F(6) | C(8) | 1.3283(6)            | C(9) | C(12) | 1.5231(3)            |



**S1.5 Bond angles for CF<sub>3</sub>C(O)SC(CH<sub>3</sub>)<sub>3</sub>**

|      | A    | B    | C | Angle/°     |       | A    | B     | C | Angle/°     |
|------|------|------|---|-------------|-------|------|-------|---|-------------|
| C(1) | S(1) | C(3) |   | 104.761(12) | C(5)  | C(3) | C(6)  |   | 111.99(3)   |
| C(7) | S(2) | C(9) |   | 104.529(11) | S(2)  | C(7) | O(2)  |   | 129.02(3)   |
| S(1) | C(1) | O(1) |   | 129.15(3)   | S(2)  | C(7) | C(8)  |   | 113.187(16) |
| S(1) | C(1) | C(2) |   | 113.45(2)   | O(2)  | C(7) | C(8)  |   | 117.76(3)   |
| O(1) | C(1) | C(2) |   | 117.37(3)   | F(4)  | C(8) | F(5)  |   | 108.07(6)   |
| F(1) | C(2) | F(2) |   | 107.94(5)   | F(4)  | C(8) | F(6)  |   | 107.66(5)   |
| F(1) | C(2) | F(3) |   | 107.87(5)   | F(4)  | C(8) | C(7)  |   | 113.38(4)   |
| F(1) | C(2) | C(1) |   | 113.75(3)   | F(5)  | C(8) | F(6)  |   | 107.28(5)   |
| F(2) | C(2) | F(3) |   | 107.55(4)   | F(5)  | C(8) | C(7)  |   | 109.36(3)   |
| F(2) | C(2) | C(1) |   | 110.30(3)   | F(6)  | C(8) | C(7)  |   | 110.88(4)   |
| F(3) | C(2) | C(1) |   | 109.23(4)   | S(2)  | C(9) | C(10) |   | 102.470(19) |
| S(1) | C(3) | C(4) |   | 101.844(19) | S(2)  | C(9) | C(11) |   | 110.82(2)   |
| S(1) | C(3) | C(5) |   | 110.821(17) | S(2)  | C(9) | C(12) |   | 110.548(16) |
| S(1) | C(3) | C(6) |   | 110.822(17) | C(10) | C(9) | C(11) |   | 110.70(3)   |
| C(4) | C(3) | C(5) |   | 110.16(2)   | C(10) | C(9) | C(12) |   | 109.89(3)   |
| C(4) | C(3) | C(6) |   | 110.77(2)   | C(11) | C(9) | C(12) |   | 112.01(2)   |

**S1.6 Torsion angles (°) for CF<sub>3</sub>C(O)SC(CH<sub>3</sub>)<sub>3</sub>**

|      |      |      |       |             |      |      |      |      |            |
|------|------|------|-------|-------------|------|------|------|------|------------|
| C(3) | S(1) | C(1) | O(1)  | 1.67(4)     | S(1) | C(1) | C(2) | F(2) | 130.65(4)  |
| C(3) | S(1) | C(1) | C(2)  | 179.82(2)   | S(1) | C(1) | C(2) | F(3) | -111.34(4) |
| C(1) | S(1) | C(3) | C(4)  | 177.200(19) | O(1) | C(1) | C(2) | F(1) | -172.39(5) |
| C(1) | S(1) | C(3) | C(5)  | 60.035(18)  | O(1) | C(1) | C(2) | F(2) | -50.96(4)  |
| C(1) | S(1) | C(3) | C(6)  | -64.939(19) | O(1) | C(1) | C(2) | F(3) | 67.04(5)   |
| C(9) | S(2) | C(7) | O(2)  | -2.94(3)    | S(2) | C(7) | C(8) | F(4) | -14.99(4)  |
| C(9) | S(2) | C(7) | C(8)  | 179.381(19) | S(2) | C(7) | C(8) | F(5) | 105.67(4)  |
| C(7) | S(2) | C(9) | C(10) | -176.39(2)  | S(2) | C(7) | C(8) | F(6) | -136.23(4) |
| C(7) | S(2) | C(9) | C(11) | 65.48(2)    | O(2) | C(7) | C(8) | F(4) | 167.04(5)  |
| C(7) | S(2) | C(9) | C(12) | -59.323(19) | O(2) | C(7) | C(8) | F(5) | -72.29(5)  |
| S(1) | C(1) | C(2) | F(1)  | 9.23(4)     | O(2) | C(7) | C(8) | F(6) | 45.80(4)   |
| C(3) | S(1) | C(1) | O(1)  | 1.67(4)     | S(1) | C(1) | C(2) | F(2) | 130.65(4)  |

**S1.7** Hydrogen atom coordinates ( $\text{\AA}\times 10^4$ ) and isotropic displacement parameters ( $\text{\AA}^2\times 10^3$ ) for  $\text{CF}_3\text{C}(\text{O})\text{SC}(\text{CH}_3)_3$

| Atom   | x        | y       | z       | U(eq) |
|--------|----------|---------|---------|-------|
| H(4A)  | 6443.79  | 1630.91 | 2313.33 | 44(3) |
| H(4B)  | 6544.11  | 2621.79 | 1212.49 | 39(3) |
| H(4C)  | 5606.96  | 1448.32 | 1016.13 | 37(3) |
| H(5A)  | 3660.27  | 2454.68 | 2993.35 | 30(2) |
| H(5B)  | 4745.96  | 1479.1  | 3271.23 | 39(2) |
| H(5C)  | 3923.81  | 1406.8  | 1959.17 | 40(3) |
| H(6A)  | 4956.72  | 4157.84 | 3298.7  | 36(3) |
| H(6B)  | 6149.91  | 4171.78 | 2567.59 | 39(3) |
| H(6C)  | 6018.77  | 3154.3  | 3657.88 | 42(3) |
| H(10A) | -662.61  | 3952.47 | 1316.96 | 35(3) |
| H(10B) | -1553.84 | 3834.64 | 2434.13 | 48(3) |
| H(10C) | -1376.21 | 2660.31 | 1547.53 | 50(3) |
| H(11A) | 184.58   | 1804.76 | 4236.96 | 31(3) |
| H(11B) | -1036.03 | 2619.74 | 4122.63 | 43(3) |
| H(11C) | -862.12  | 1427.61 | 3206.89 | 51(3) |
| H(12A) | 1438.02  | 1943.76 | 2623.16 | 37(3) |
| H(12B) | 343.45   | 1617.49 | 1605.84 | 36(2) |
| H(12C) | 1080.02  | 2881.75 | 1454.9  | 44(3) |

**S1.8** Local coordinate system

|                               |                                |
|-------------------------------|--------------------------------|
| S(1) C(1) Z S(1) C(3) Y       | C(11) H(11C) Z C(11) H(11A) Y  |
| S(2) C(7) Z S(2) C(9) Y       | C(12) H(12B) Z C(12) H(12A) Y  |
| F(1) C(2) Z F(1) F(3) Y       | H(4A) C(4) Z H(4A) H(4B) Y     |
| F(2) C(2) Z F(2) F(3) Y       | H(4B) C(4) Z H(4B) H(4A) Y     |
| F(3) C(2) Z F(3) F(2) Y       | H(4C) C(4) Z H(4C) H(4B) Y     |
| F(4) C(8) Z F(4) F(6) Y       | H(5A) C(5) Z H(5A) H(5B) Y     |
| F(5) C(8) Z F(5) F(6) Y       | H(5B) C(5) Z H(5B) H(5A) Y     |
| F(6) C(8) Z F(6) F(5) Y       | H(5C) C(5) Z H(5C) H(5A) Y     |
| O(1) C(1) Z O(1) C(2) Y       | H(6A) C(6) Z H(6A) H(6B) Y     |
| O(2) C(7) Z O(2) C(8) Y       | H(6B) C(6) Z H(6B) H(6A) Y     |
| C(1) O(1) Z C(1) C(2) Y       | H(6C) C(6) Z H(6C) H(6A) Y     |
| C(2) F(2) Z C(2) F(1) Y       | H(10A) C(10) Z H(10A) H(10B) Y |
| C(3) C(5) Z C(3) C(6) Y       | H(10B) C(10) Z H(10B) H(10A) Y |
| C(4) H(4C) Z C(4) H(4A) Y     | H(10C) C(10) Z H(10C) H(10B) Y |
| C(5) H(5B) Z C(5) H(5C) Y     | H(11A) C(11) Z H(11A) H(11B) Y |
| C(6) H(6A) Z C(6) H(6B) Y     | H(11B) C(11) Z H(11B) H(11C) Y |
| C(7) O(2) Z C(7) C(8) Y       | H(11C) C(11) Z H(11C) H(11B) Y |
| C(8) F(6) Z C(8) F(4) Y       | H(12A) C(12) Z H(12A) H(12C) Y |
| C(9) C(11) Z C(9) C(12) Y     | H(12B) C(12) Z H(12B) H(12C) Y |
| C(10) H(10C) Z C(10) H(10A) Y | H(12C) C(12) Z H(12C) H(12A) Y |

**Figure S5.** Fractal dimension plot <sup>[5]</sup>

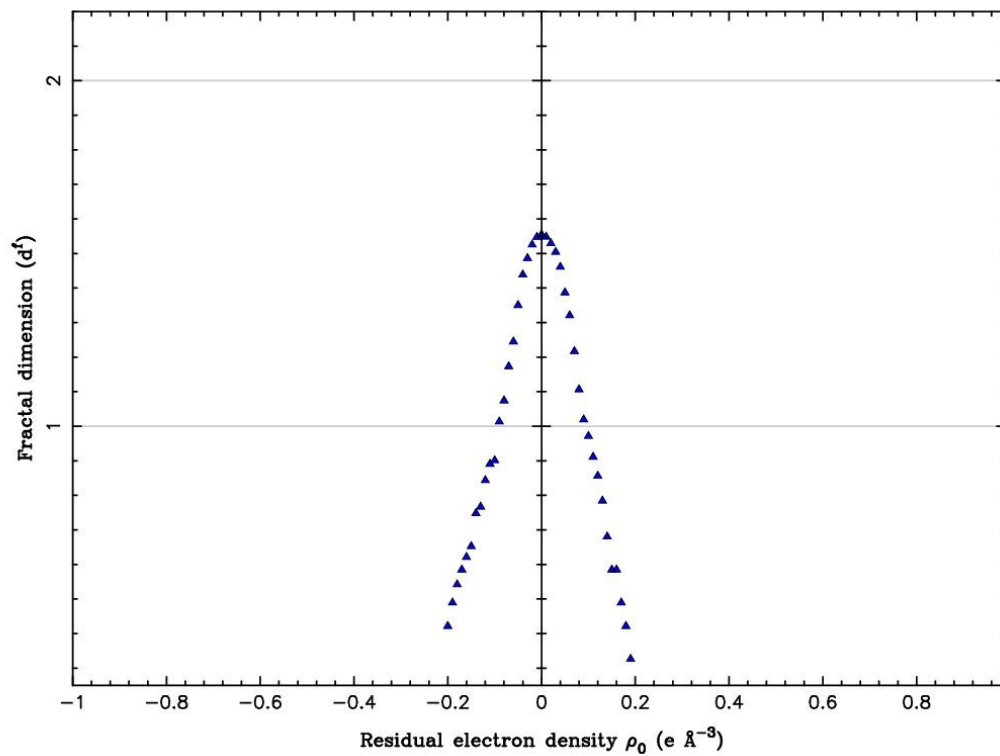

Plot generated with WinGX<sup>[6]</sup>

**Figure S6.** Diagrams of border molecular orbitals of *syn*-CF<sub>3</sub>C(O)SC(CH<sub>3</sub>)<sub>3</sub> calculated with the TD-B3LYP/cc-pVTZ approximation.

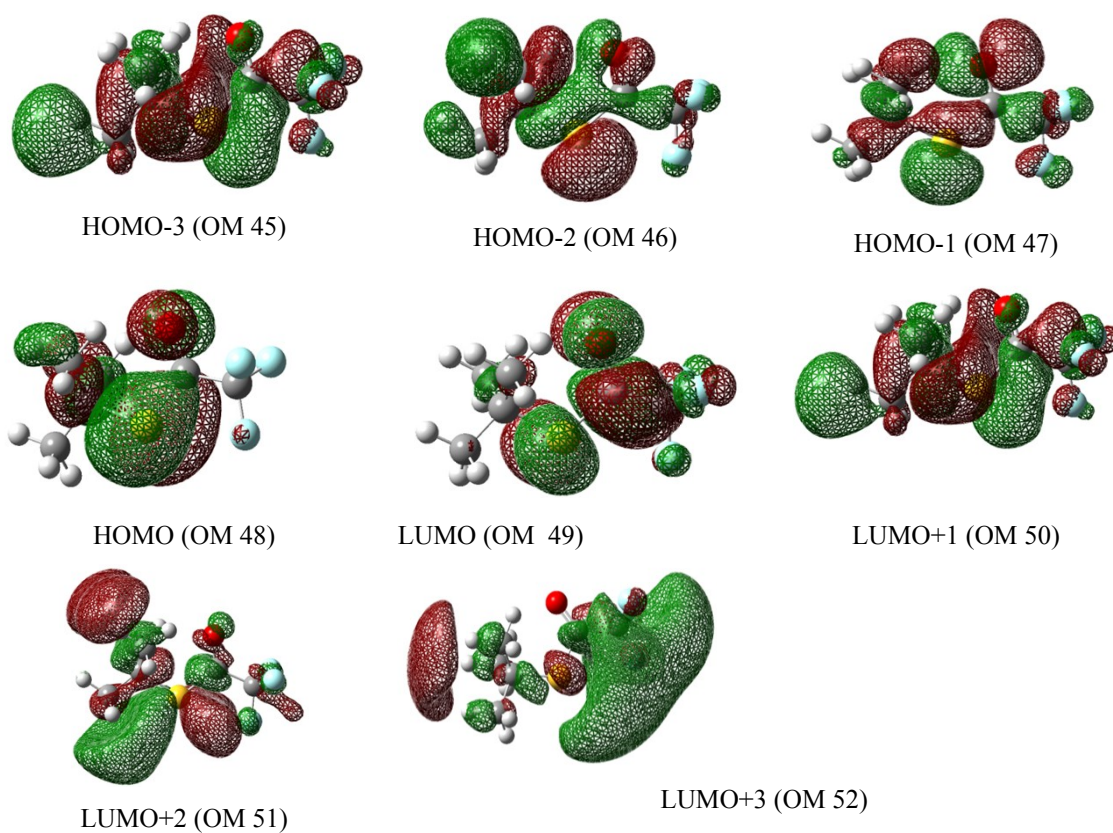

**Table S2.** Calculated and assignment of the UV spectrum of *syn*-CF<sub>3</sub>C(O)SC(CH<sub>3</sub>)<sub>3</sub> using the TD-B3LYP/cc-pVTZ approximation

| Transition (Contribution %)            | <i>E</i> (eV) | $\lambda_{\text{calculated}}$ (nm) | <i>f</i> * | $\lambda_{\text{experimental}}$ (nm) |
|----------------------------------------|---------------|------------------------------------|------------|--------------------------------------|
| 47→50 (12) / 47→52 (11) / 48 → 49 (68) | 5.4283        | 228.4                              | 0.0875     | 238                                  |
| 47 → 50 (68) / 47→51 (10)              | 6.9079        | 179.8                              | 0.0204     | 203                                  |

\*Oscillator force, with *f*\*>0.02

**Table S3.** Wavenumbers and assignment for the IR absorptions appearing after broadband UV-Visible photolysis of an 1:1000 Ar matrix containing  $\text{CF}_3\text{C}(\text{O})\text{SC}(\text{CH}_3)_3$  at about 10 K.

| Ar-Matrix | Tentative assignment           |                                     | Reported wavenumbers |
|-----------|--------------------------------|-------------------------------------|----------------------|
|           | Molecule                       | Vibrational mode                    |                      |
| 2999.8    | $(\text{CH}_3)_3\text{CSCF}_3$ | $\nu_{\text{as}}(\text{C-H})$       | 3029.9               |
| 2979.5    | $(\text{CH}_3)_3\text{CSCF}_3$ | $\nu_{\text{as}}(\text{C-H})$       | 3004.6               |
| 2952.7    | $(\text{CH}_3)_3\text{CSCF}_3$ | $\nu_{\text{as}}(\text{C-H})$       | 2998.8               |
| 2937      | $(\text{CH}_3)_3\text{CSCF}_3$ | $\nu_{\text{as}}(\text{C-H})$       | 2994.2               |
| 2912.9    | $(\text{CH}_3)_3\text{CSCF}_3$ | $\nu_{\text{as}}(\text{C-H})$       | 2938.1               |
| 2912.9    | $(\text{CH}_3)_3\text{CSCF}_3$ | $\nu_{\text{as}}(\text{C-H})$       | 2931.9               |
| 2912.9    | $(\text{CH}_3)_3\text{CSCF}_3$ | $\nu_{\text{as}}(\text{C-H})$       | 2930.0               |
| 2138.3    | CO                             | $\nu(\text{C=O})$                   | 2138.6 <sup>1</sup>  |
| 2136.6    | CO                             | $\nu(\text{C=O})$                   |                      |
| 2133.1    | CO                             | $\nu(\text{C=O})$                   |                      |
| 2091.2    | $^{13}\text{C}^{16}\text{O}$   | $\nu(^{13}\text{CO})$               | 2091.4 <sup>1</sup>  |
| 2089.6    | $^{13}\text{C}^{16}\text{O}$   | $\nu(^{13}\text{CO})$               |                      |
| 2047.9    | OCS                            | $\nu(\text{C=O})$                   | 2051.6 <sup>2</sup>  |
| 1934.9    | $\text{OCF}_2$                 | $\nu(\text{C=O})$                   | 1941.4 <sup>3</sup>  |
| 1906.3    | $\text{OCF}_2$                 | $2(\nu_s\text{CF}_2)$               | 1913.5 <sup>3</sup>  |
| 1477.2    | $(\text{CH}_3)_3\text{CSCF}_3$ | $\delta(\text{CH}_3)$               | 1471.5               |
| 1467.7    | $(\text{CH}_3)_3\text{CSCF}_3$ | $\delta(\text{CH}_3)$               | 1455.8               |
| 1463.2    | $(\text{CH}_3)_3\text{CSCF}_3$ | $\delta(\text{CH}_3)$               |                      |
| 1451.3    | $(\text{CH}_3)_3\text{CSCF}_3$ | $\delta(\text{CH}_3)$               | 1454.5               |
| 1443.7    | $(\text{CH}_3)_3\text{CSCF}_3$ | $\delta(\text{CH}_3)$               |                      |
| 1397.8    | $(\text{CH}_3)_3\text{CSCF}_3$ | $\rho\text{CH}_3$                   | 1391.5               |
| 1379.0    | $(\text{CH}_3)_3\text{CSCF}_3$ | $\delta(\text{CH}_3)$               | 1365.5               |
| 1373.1    | $(\text{CH}_3)_3\text{CSCF}_3$ | $\delta(\text{CH}_3)$               |                      |
| 1369.7    | $(\text{CH}_3)_3\text{CSCF}_3$ | $\delta(\text{CH}_3)$               | 1360.6               |
| 1354.9    | $\text{SCF}_2$                 | $\nu(\text{C=S})$                   | 1368 <sup>4</sup>    |
| 1227.5    | $\text{OCF}_2$                 | $\nu_2(\nu_{\text{as}}\text{CF}_2)$ | 1237.8 <sup>3</sup>  |
| 1219.4    | $\text{OCF}_2$                 | $\nu_2(\nu_{\text{as}}\text{CF}_2)$ |                      |
| 1184.7    | $\text{SCF}_2$                 | $\nu_{\text{as}}(\text{CF}_2)$      | 1189 <sup>4</sup>    |
| 1174.2    | $(\text{CH}_3)_3\text{CSCF}_3$ | $\nu_s(\text{CC}_3)$                | 1157.3               |
| 1146.5    | $(\text{CH}_3)_3\text{CSCF}_3$ | $\nu_{\text{as}}(\text{CF}_3)$      | 1093.9               |
| 1123.5    | $(\text{CH}_3)_3\text{CSCF}_3$ | $\nu_{\text{as}}(\text{CF}_3)$      | 1062.2               |
| 1111.6    | $(\text{CH}_3)_3\text{CSCF}_3$ | $\nu_s(\text{CF}_3)$                | 1053.1               |
| 1082.6    | $(\text{CH}_3)_3\text{CSCF}_3$ | $\delta(\text{CH}_3)$               | 1019.1               |
| 1060.7    | $(\text{CH}_3)_3\text{CSCF}_3$ | $\delta(\text{CH}_3)$               | 1010.2               |
| 1031.3    | $(\text{CH}_3)_3\text{CSCF}_3$ | $\delta(\text{CH}_3)$               |                      |
| 1025.1    | $(\text{CH}_3)_3\text{CSCF}_3$ | $\delta(\text{CH}_3)$               | 965.4                |
| 964.5     | $\text{OCF}_2$                 | $\nu_2(\nu_s\text{CF}_2)$           | 965.5 <sup>3</sup>   |
| 893.1     | $(\text{CH}_3)_3\text{CSCF}_3$ | $\delta\text{C}(\text{CH}_3)_3$     | 908.4                |
| 759.3     | $(\text{CH}_3)_3\text{CSCF}_3$ | $\nu(\text{S-CF}_3)$                | 726.6                |
| 755.9     | $(\text{CH}_3)_3\text{CSCF}_3$ | $\nu(\text{S-CF}_3)$                |                      |
| 594.5     | $(\text{CH}_3)_3\text{CSCF}_3$ | $\nu(\text{S-CC}_3)$                | 560.5                |
| 552.5     | $(\text{CH}_3)_3\text{CSCF}_3$ | $\delta(\text{CF}_3)$               | 524.2                |
| 541.6     | $(\text{CH}_3)_3\text{CSCF}_3$ | $\delta(\text{CF}_3)$               | 518.1                |
| 496.4     | $(\text{CH}_3)_3\text{CSCF}_3$ | $\delta(\text{CF}_3)$               | 472.9                |

\*This work, tentative assignment with B3LYP/aug-cc-pVTZ. Vibrational modes:  $\delta$  = bending,  $\nu$  = stretching, s = symmetric, as = antiymmetric.

## References

1. H. Dubost, *J. Chem. Phys.* **1976**, *12*(2), 139–151.
2. V. I. Lang, J. S. Winn, *J. Chem. Phys.* **1991**, *94*(8), 5270 - 5274.
3. Y. Bouteiller, O. Abdelaoui, A. Schriver, L. J. Schriver-Mazzuoli, *J. Chem. Phys.* **1995**, *102*(4), 1731 – 1739.
4. V. K. Shen, D. W. Siderius, W.P. Krekelberg, H.W. Hatch, *NIST Standard Reference Simulation Website, NIST Standard Reference Database Number 173, National Institute of Standards and Technology, Gaithersburg MD, 20899*. <http://doi.org/10.18434/T4M88Q>
5. K. Meindl , J. Henn, *Acta Cryst.* **2008**, *A64* (3), 404 - 418.
6. L. J. Farrugia, *J. Appl. Crystallogr.* **1999**, *32* (4), 837 - 838.
